# Supplementary material for: LDHA Suppression Altering Metabolism Inhibits Tumor Progress by an Organic Arsenical
Source: PubMed Central journal article supplement (PMC6940739; doi:10.3390/ijms20246239), 2019-12-11
Supplement: ijms-20-06239-s001.pdf [file ijms-20-06239-s001.pdf]

## Supporting information

### A: PDT-PAO

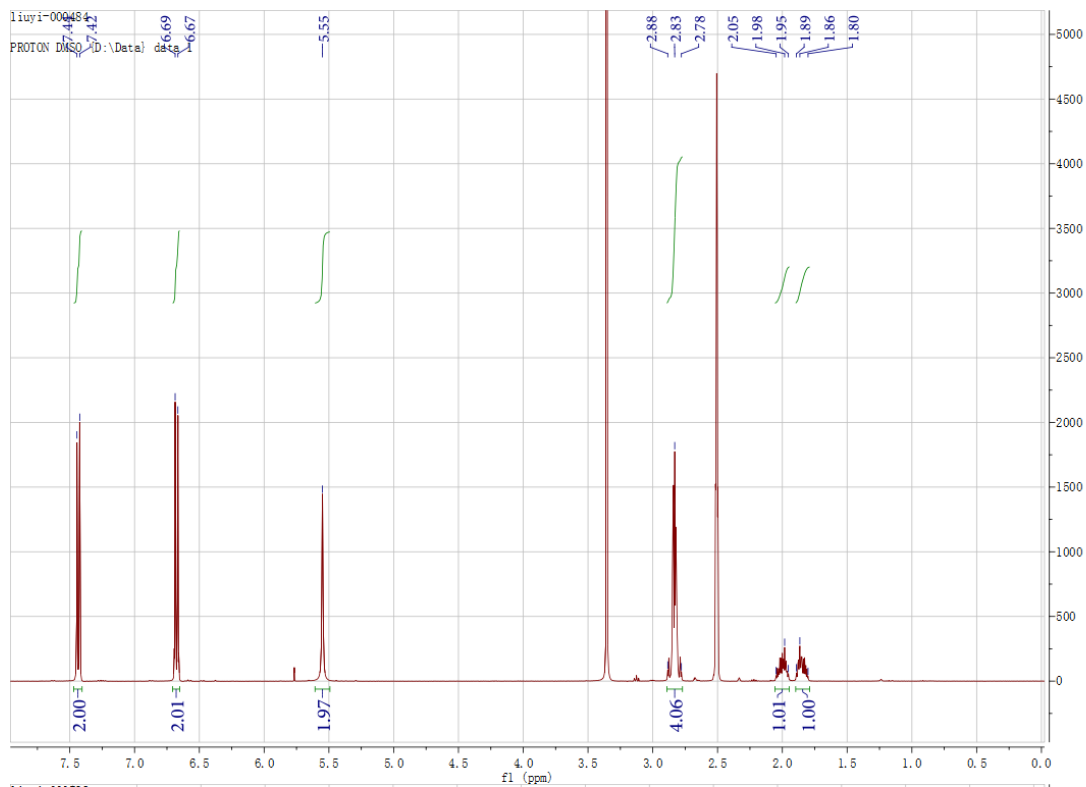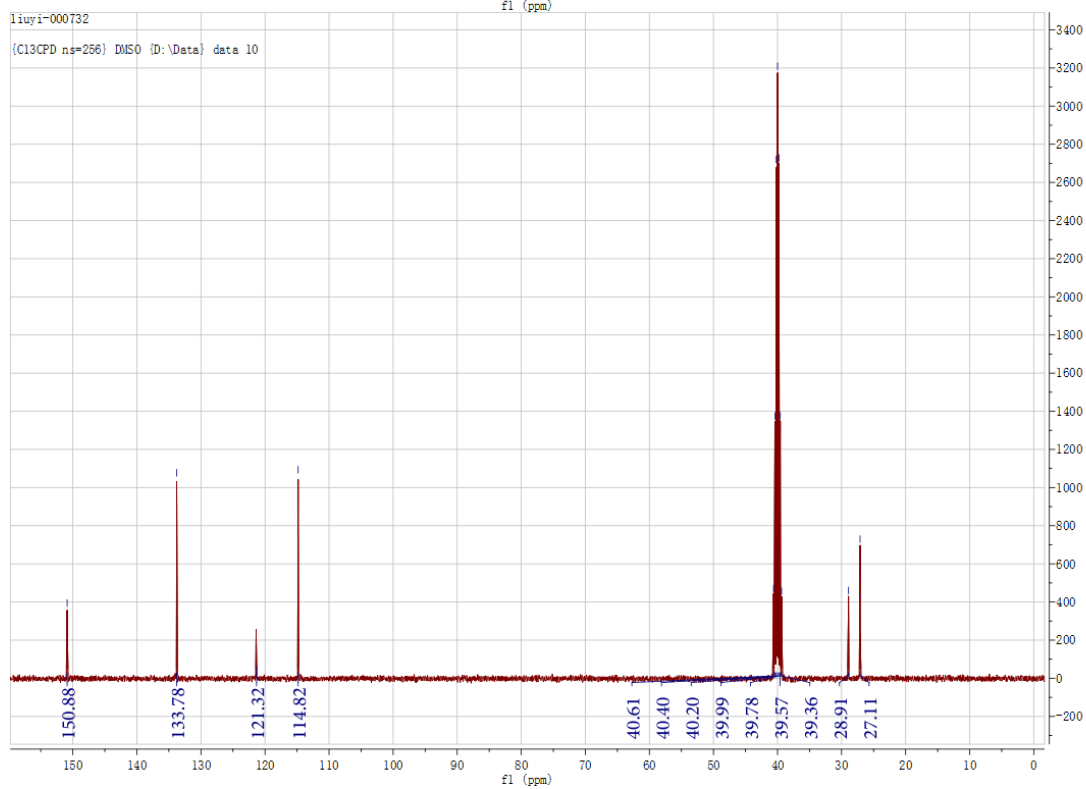

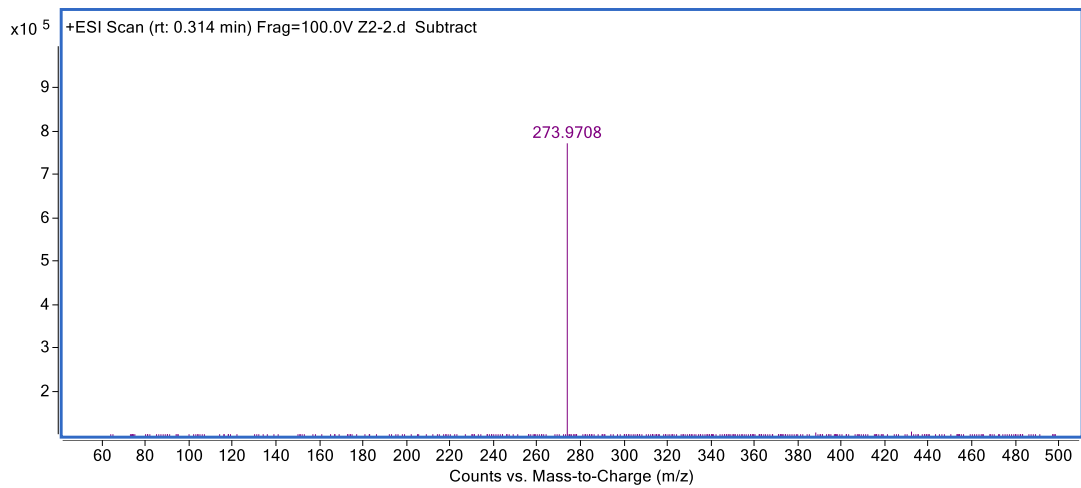

B: PDT-BIPA

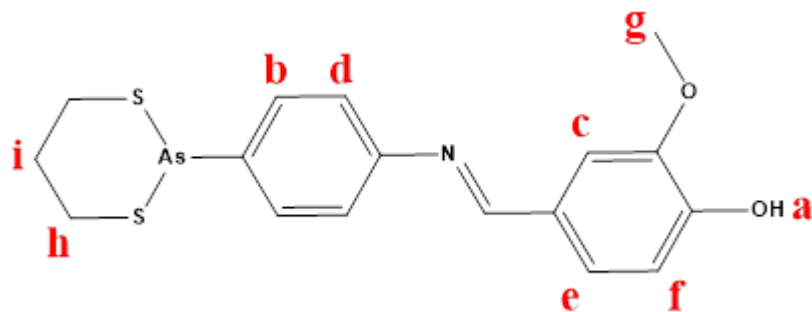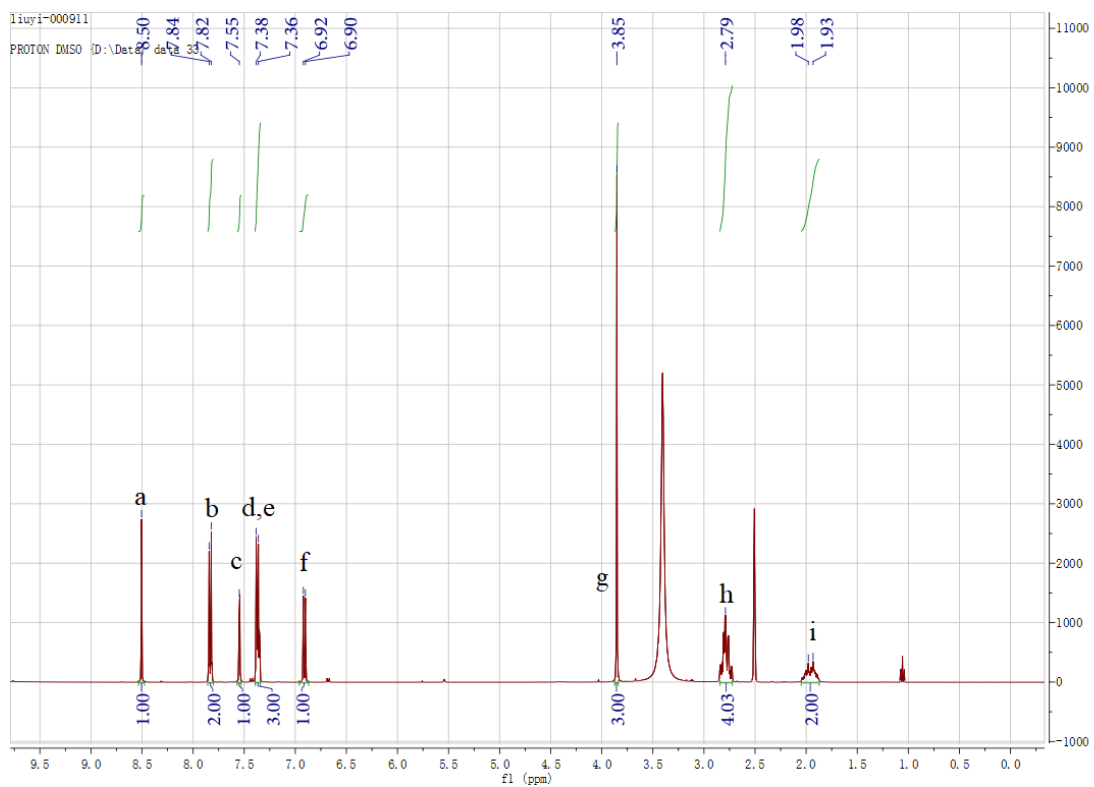

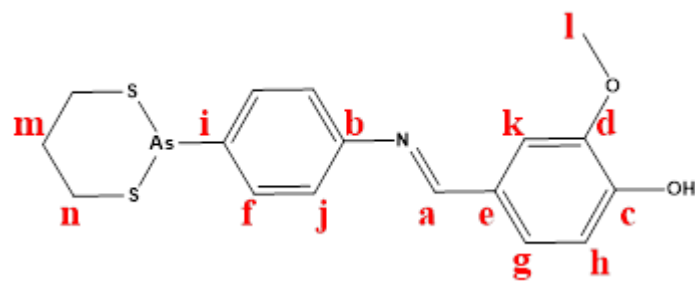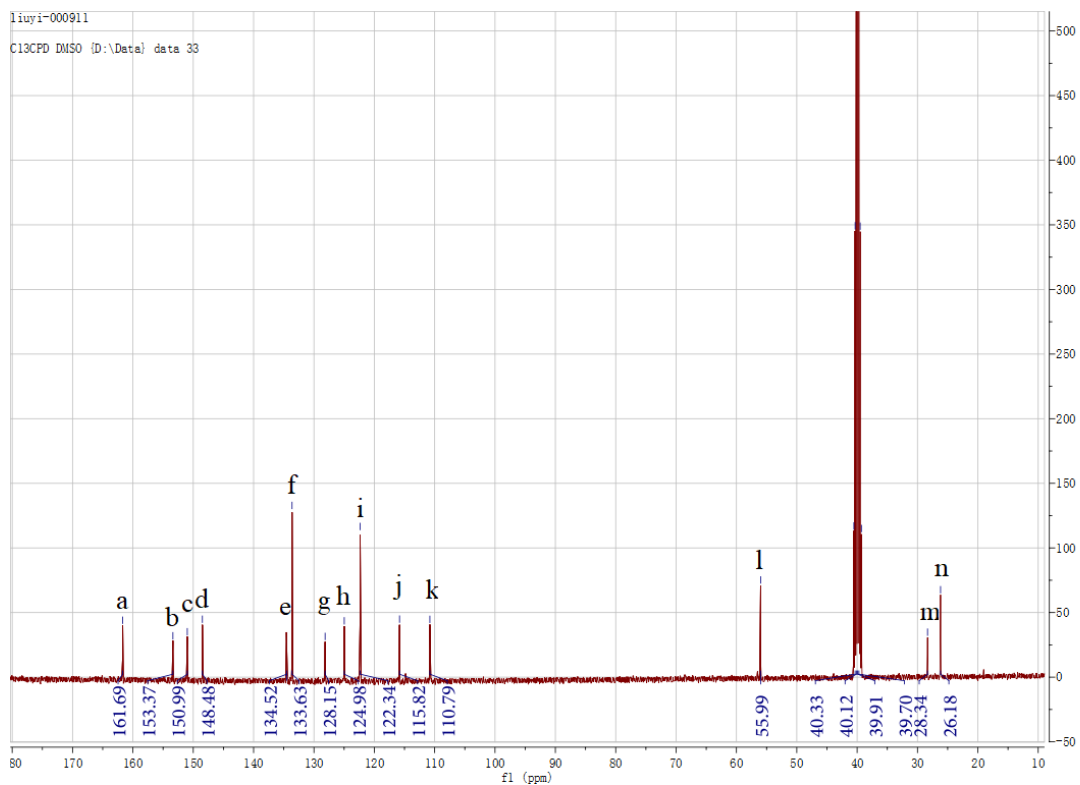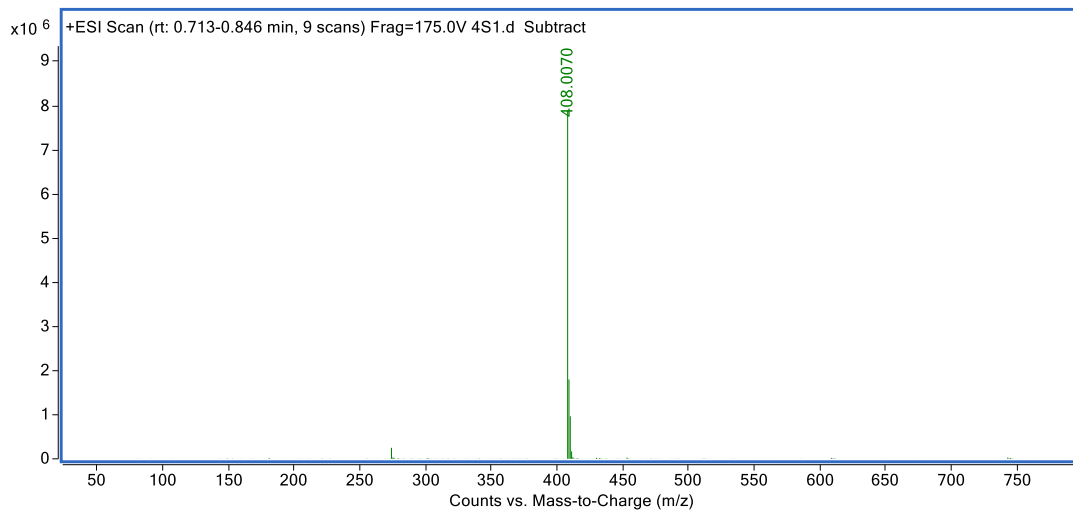

**Figure S1.**  $^1\text{H}$  and  $^{13}\text{C}$  NMR and Mass spectra of PDT-PAO (A) and PDT-BIPA (B).

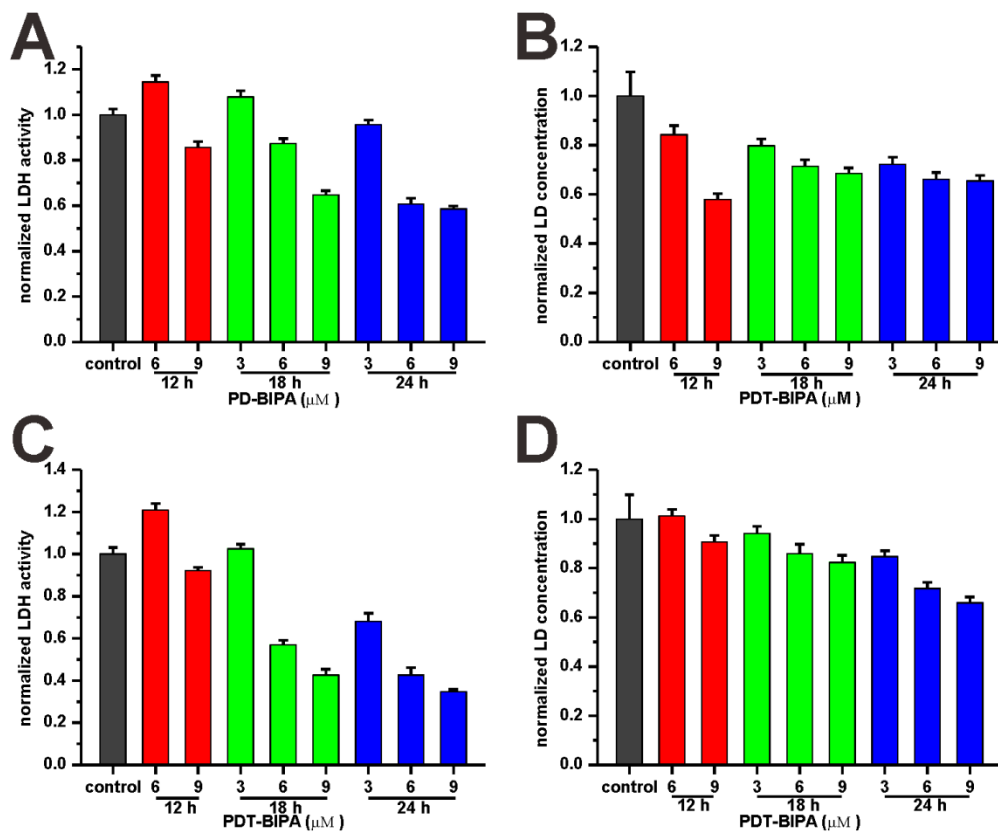

**Figure S2.** LDH inhibition and LD reduction. GES cells were incubated with PDT-BIPA of several concentrations for 3, 6, 9 h or 12, 18, 24 h. The LDH activity and LD concentration of the cell lysate (A, B) or the medium (C, D) were tested according to the kit instruction.

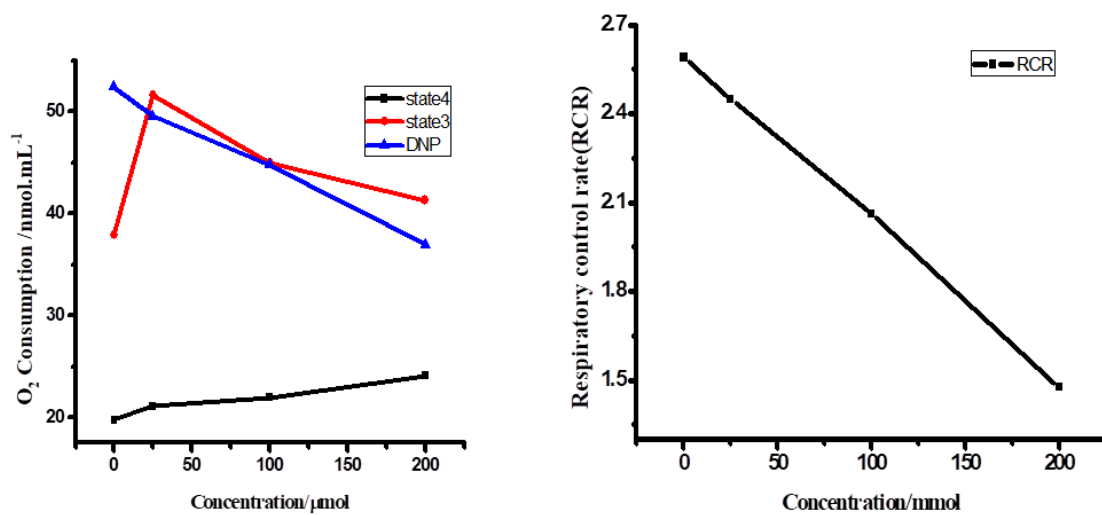

**Figure S3.** The OCR of isolated mitochondria and the reduced RCR.

**Table S1.** Influence of PDT-BIPA on mitochondrial metabolism parameters.<sup>[a]</sup>

| As/ $\mu\text{M}$ | 0 | 50 | 100 | 200 |
|-------------------|---|----|-----|-----|
|-------------------|---|----|-----|-----|

|                                     |        |        |         |         |
|-------------------------------------|--------|--------|---------|---------|
| <b>Q/J</b>                          | 11.87  | 11.51  | 10.17   | 10.07   |
| <b>k<sub>1</sub>/h<sup>-1</sup></b> | 0.2000 | 0.1809 | 0.1657  | 0.1361  |
| <b>R<sub>1</sub><sup>2</sup></b>    | 0.9900 | 0.9971 | 0.9967  | 0.9912  |
| <b>t<sub>1</sub>/h</b>              | 30.78  | 42.51  | 45.15   | 52.55   |
| <b>P<sub>1</sub>/μW</b>             | 171.51 | 168.66 | 170.99  | 140.11  |
| <b>K<sub>2</sub>/h<sup>-1</sup></b> | 0.0927 | 0.0731 | 0.0600  | 0.1521  |
| <b>R<sub>2</sub><sup>2</sup></b>    | 0.9935 | 0.9929 | 0.9907  | 0.9933  |
| <b>t<sub>2</sub>/h</b>              | 36.53  | 47.31  | 49.43   | 55.58   |
| <b>P<sub>2</sub>/μW</b>             | 266.56 | 232.97 | 215.78  | 200.43  |
| <b>K<sub>3</sub>/h<sup>-1</sup></b> | -0.348 | -0.274 | -0.1923 | -0.1253 |
| <b>R<sub>3</sub><sup>2</sup></b>    | 0.9830 | 0.9849 | 0.9869  | 0.9858  |

[a]  $k_1$ : rate constant in activity recovery phase;  $k_2$ : rate constant in stationary increase phase;  $k_3$ : rate constant in decline phase; R: correlation coefficient;  $P_m$ : maximum power output;  $t_m$ : maximum power output time; Q: total heat output.
